# Supplementary material
Source: HighWire-hosted journal article supplement (https://bmjophth.bmj.com/content/6/1/e000429)

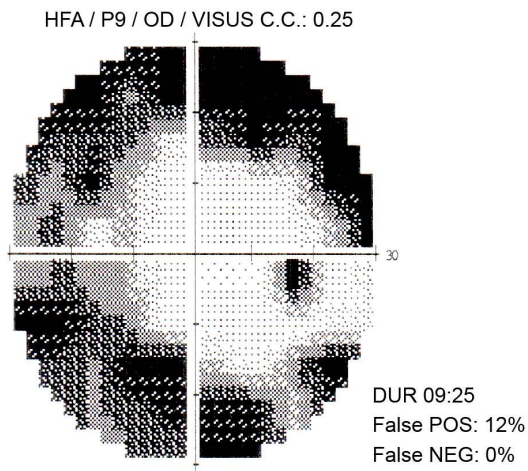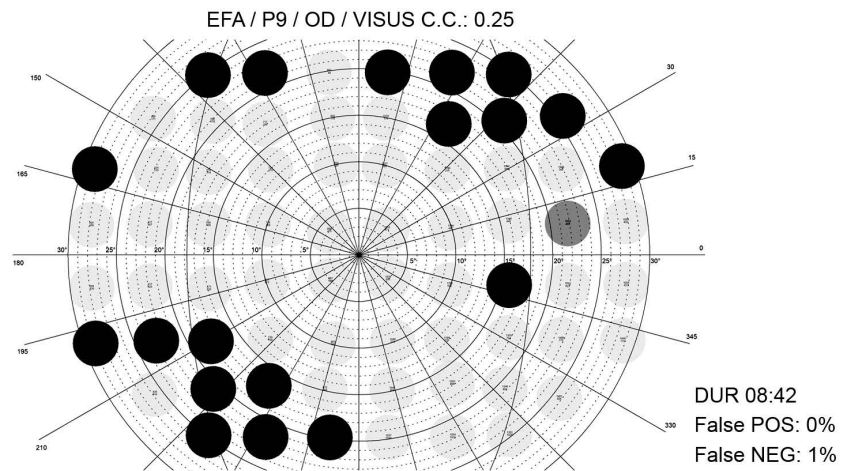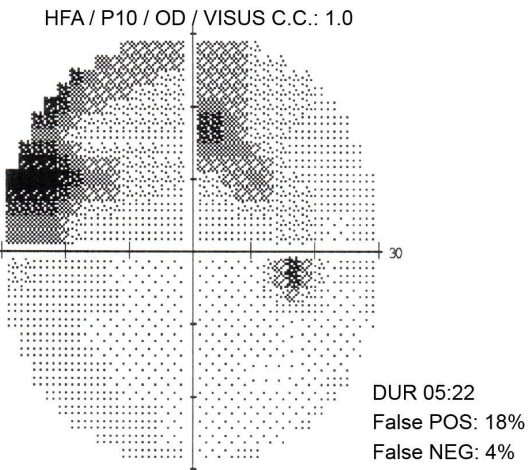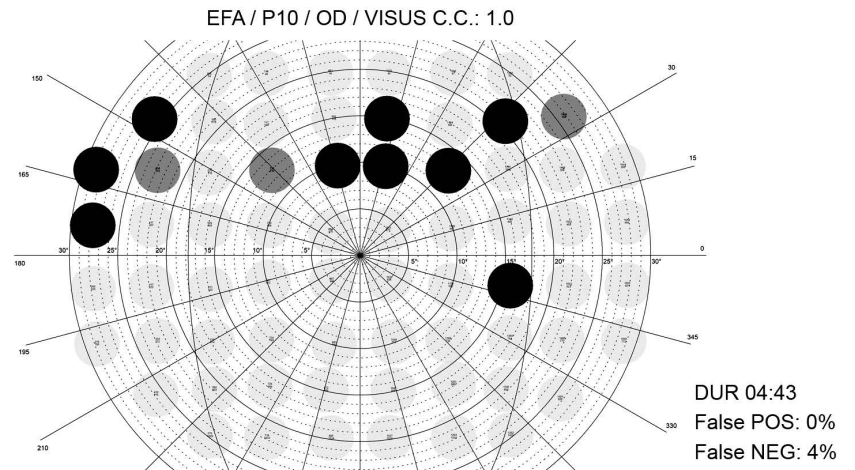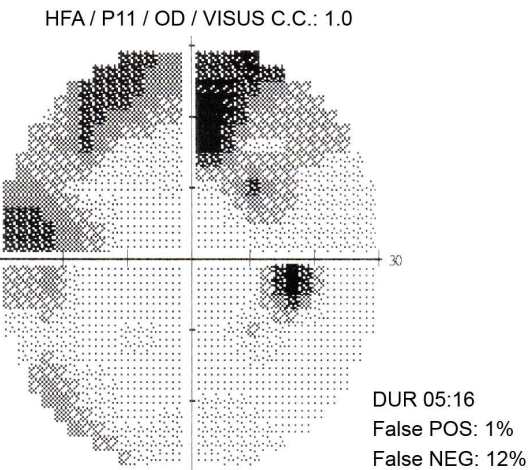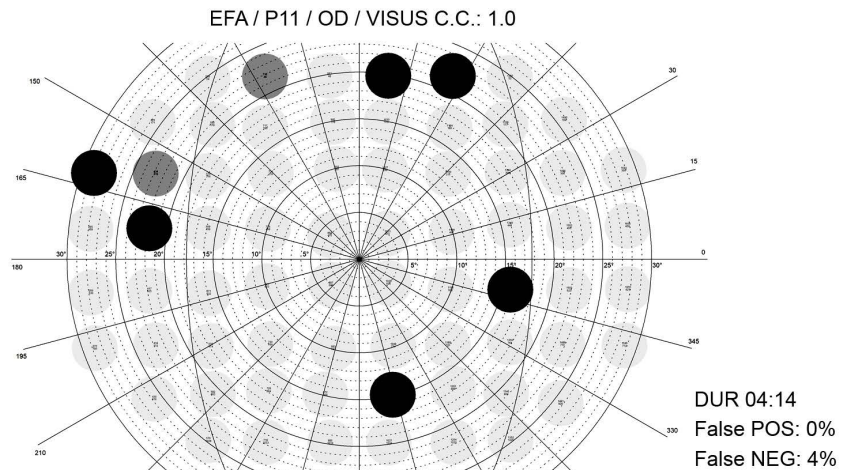

Supplement: inline-supplementary-material-8 [file inline-supplementary-material-8.pdf]
